# Supplementary material for: Synthesis and photocatalytic properties of flower-like zirconia nanostructures
Source: Royal Society of Chemistry journal article supplement (doi:10.1039/c1ce06155k), 2011-11-17

## Supporting Information

**Fig. S1** The RhB concentration as a function of keeping time before UV irradiation over the flower-like product (prepared with 0.06 M  $\text{CH}_3\text{COONa}$ )

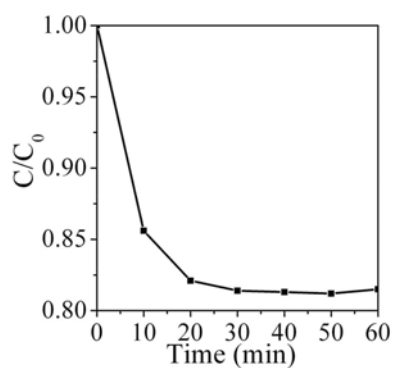

**Fig. S2** SEM and XRD patterns of the products prepared with 0.15 M  $\text{CH}_3\text{COONa}$ .

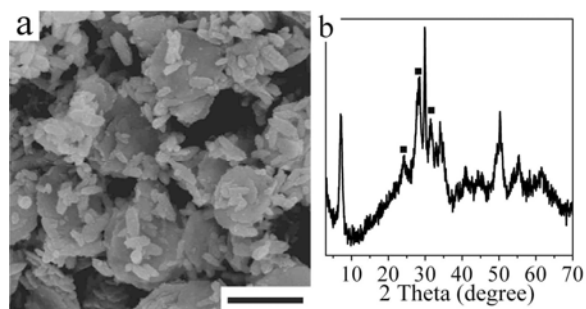

**Fig. S3** TG curves of the samples obtained at different  $\text{CH}_3\text{COONa}$  concentrations.

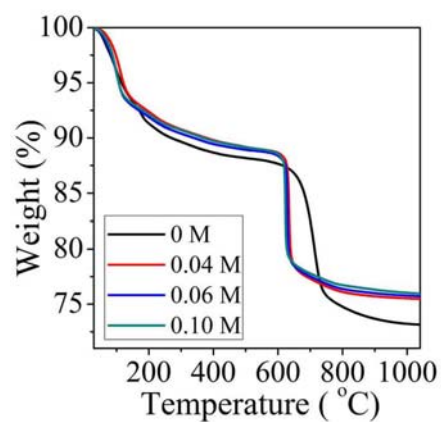

**Fig. S4** SEM images of the products after calcination prepared at different  $\text{CH}_3\text{COONa}$  concentrations (a) 0, (b) 0.04 M, (c) 0.06 M, (d) 0.10 M, and XRD patterns of the corresponding products. Scale bar: 500 nm.

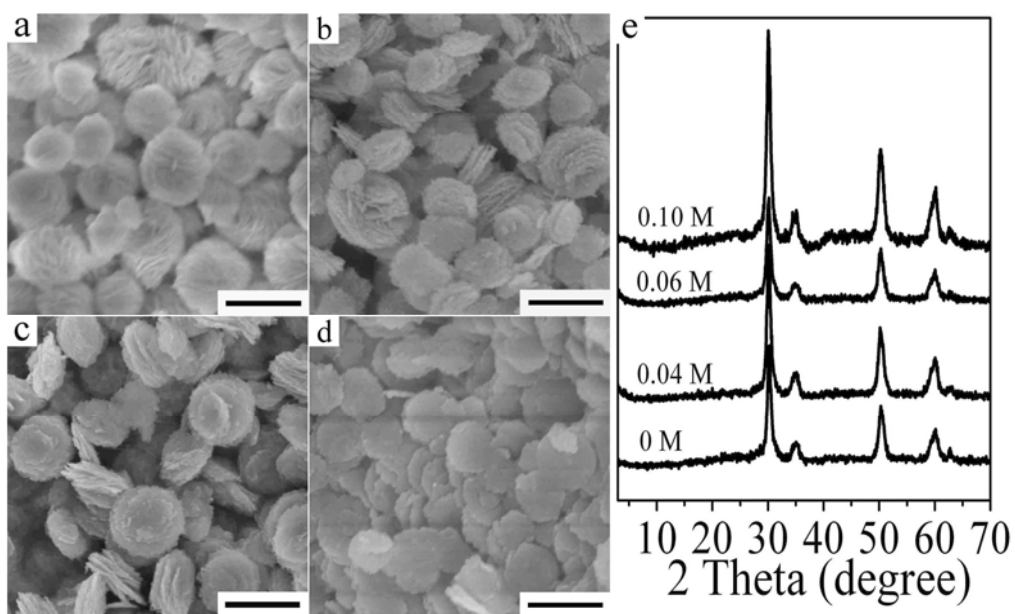

**Fig. S5** SEM images of hydrothermal precursor prepared at different KOH concentrations: (a) 0.0, (b) 0.04 M, (c) 0.06 M, (d) 0.10 M. Scale bar: 500 nm.

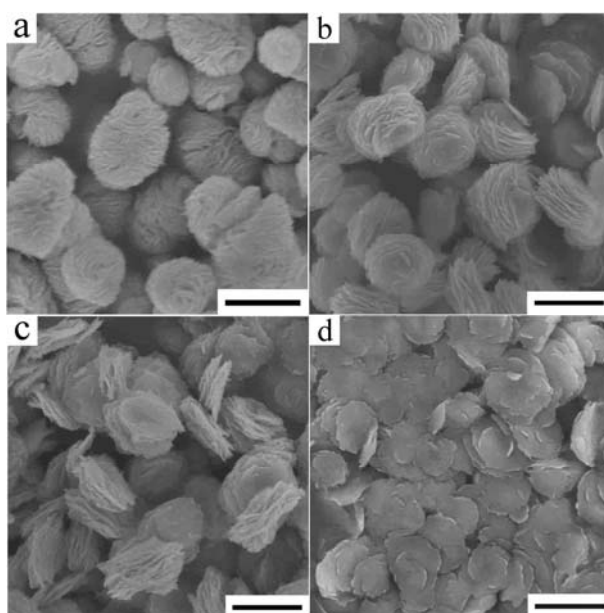

**Fig. S6** The RhB concentration as a function of UV irradiation time over ZrO<sub>2</sub> products prepared at different CH<sub>3</sub>COONa concentrations.

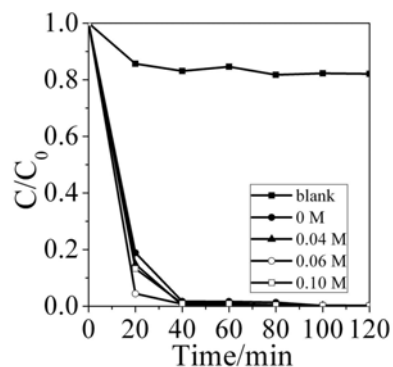

**Preparation of tetragonal ZrO<sub>2</sub> nanoparticles:** Tetragonal ZrO<sub>2</sub> nanoparticles were prepared according to the literature.<sup>11</sup> Initially, 2.58 g ZrOCl<sub>2</sub>·8H<sub>2</sub>O and 4.80 g urea were dissolved in 20.0 mL CH<sub>3</sub>OH under stirring to form a colorless solution. The solution was transferred to a 20-mL Teflon-lined stainless steel autoclave, which was heated to 200 °C and maintained at that temperature for 20 h. The obtained white product was post-treated with sulphuric acid solution (0.167 mmol), and then calcined at 645 °C.

**Fig. S7** TEM image and XRD pattern of tetragonal ZrO<sub>2</sub> nanoparticles.

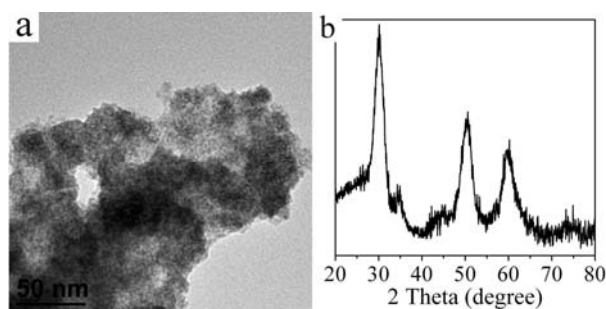

**Fig. S8** UV-vis absorption spectra of the flower-like product (prepared with 0.06 M CH<sub>3</sub>COONa) and ZrO<sub>2</sub> nanoparticles.

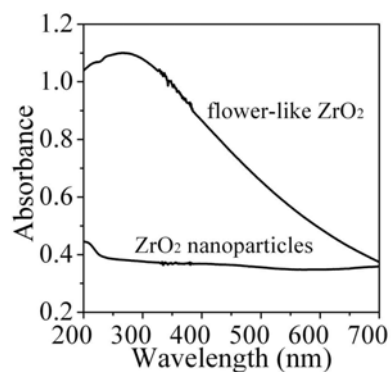

Supplement: c1ce06155k.pdf [file c1ce06155k.pdf]
